# Supplementary material
Source: HighWire-hosted journal article supplement (https://gut.bmj.com/content/71/8/1544)
Supplement: inline-supplementary-material-1 [file inline-supplementary-material-1.pdf]

**Supplementary Table 1.** Patient characteristics before and after matching. SMD stands for standardised mean difference. PPI stands for proton-pump inhibitor. IPTW, inverse probability treatment weighting; SMD, standardised mean difference; SD, standard deviation; BP, blood pressure; GBS, Glasgow-Blatchford score; PPI, proton pump inhibitor; H2RA, histamine-2 receptor antagonist.

|                                             | Before IPTW     |                 |                 |       | After IPTW      |                |                 |       |
|---------------------------------------------|-----------------|-----------------|-----------------|-------|-----------------|----------------|-----------------|-------|
|                                             | Early           | Urgent          | Late            | SMD   | Early           | Urgent         | Late            | SMD   |
| <b>n</b>                                    | 3865            | 1008            | 1601            |       | 3865            | 1008           | 1601            |       |
| <b>Male (%)</b>                             | 2700 (69.9)     | 729 (72.3)      | 1076 (67.2)     | 0.074 | 2698 (69.8)     | 719 (71.3)     | 1093 (68.3)     | 0.044 |
| <b>Age (mean (SD))</b>                      | 67.11 (17.04)   | 66.37 (16.93)   | 70.15 (15.76)   | 0.153 | 67.66 (16.76)   | 67.36 (16.77)  | 68.13 (16.46)   | 0.031 |
| <b>Antithrombotic use (%)</b>               | 463 (12.0)      | 127 (12.6)      | 229 (14.3)      | 0.046 | 475 (12.3)      | 128 (12.7)     | 202 (12.6)      | 0.008 |
| <b>PPI or H2RA use (%)</b>                  | 3602 (93.2)     | 815 (80.9)      | 1485 (92.8)     | 0.249 | 3544 (91.7)     | 910 (90.3)     | 1478 (92.3)     | 0.049 |
| <b>Bleeding severity</b>                    |                 |                 |                 |       |                 |                |                 |       |
| Modified GBS (mean (SD))                    | 8.30 (3.21)     | 9.37 (2.81)     | 7.91 (3.33)     | 0.316 | 8.36 (3.21)     | 8.54 (3.18)    | 8.26 (3.16)     | 0.059 |
| Pulse (mean (SD))                           | 88.95 (17.14)   | 89.94 (17.95)   | 87.91 (17.58)   | 0.077 | 88.84 (17.17)   | 88.88 (17.60)  | 88.56 (17.06)   | 0.012 |
| Systolic BP (mean (SD))                     | 127.75 (22.63)  | 122.71 (22.77)  | 129.05 (23.33)  | 0.184 | 127.42 (22.72)  | 126.3 (21.99)  | 127.71 (22.53)  | 0.042 |
| <b>Laboratory values</b>                    |                 |                 |                 |       |                 |                |                 |       |
| Haemoglobin (g/dL) (mean (SD))              | 8.97 (2.79)     | 8.18 (2.64)     | 9.28 (2.76)     | 0.270 | 8.93 (2.77)     | 8.81 (2.73)    | 9.02 (2.73)     | 0.050 |
| Platelets (x10 <sup>9</sup> /L) (mean (SD)) | 231.13 (106.06) | 224.34 (103.76) | 228.05 (100.01) | 0.044 | 229.88 (106.99) | 227.37 (97.50) | 227.48 (98.83)  | 0.016 |
| Urea (mmol/L) (mean (SD))                   | 13.83 (8.49)    | 15.50 (8.63)    | 13.72 (9.13)    | 0.136 | 14.02 (8.63)    | 14.24 (8.18)   | 13.9 (8.57)     | 0.027 |
| Creatinine (μmol/L) (mean (SD))             | 108.80 (110.31) | 118.03 (109.93) | 119.00 (137.80) | 0.058 | 110.27 (111.87) | 109.48 (94.82) | 117.08 (135.36) | 0.043 |
| Urea-creatinine ratio (mean (SD))           | 143.64 (64.36)  | 150.41 (65.17)  | 133.59 (62.71)  | 0.175 | 143.94 (64.68)  | 145.88 (65.90) | 139.1 (62.48)   | 0.070 |
| Prothrombin time (secs) (mean (SD))         | 13.87 (8.17)    | 14.27 (8.47)    | 14.53 (10.46)   | 0.049 | 14.03 (8.66)    | 13.72 (7.34)   | 13.9 (7.90)     | 0.027 |
| <b>Charlson Comorbidity Index</b>           |                 |                 |                 |       |                 |                |                 |       |
| Cancer (%)                                  | 299 (7.7)       | 87 (8.6)        | 158 (9.9)       | 0.050 | 309 (8.0)       | 79 (7.8)       | 141 (8.8)       | 0.025 |
| Metastatic disease (%)                      | 104 (2.7)       | 27 (2.7)        | 50 (3.1)        | 0.018 | 108 (2.8)       | 22 (2.2)       | 46 (2.9)        | 0.032 |
| Congestive heart failure (%)                | 135 (3.5)       | 34 (3.4)        | 79 (4.9)        | 0.052 | 143 (3.7)       | 34 (3.4)       | 62 (3.9)        | 0.019 |
| Myocardial infarction (%)                   | 53 (1.4)        | 21 (2.1)        | 25 (1.6)        | 0.037 | 54 (1.4)        | 16 (1.6)       | 26 (1.6)        | 0.007 |
| Stroke (%)                                  | 176 (4.6)       | 50 (5.0)        | 91 (5.7)        | 0.034 | 182 (4.7)       | 49 (4.9)       | 83 (5.2)        | 0.013 |
| Peripheral vascular disease (%)             | 30 (0.8)        | 13 (1.3)        | 14 (0.9)        | 0.034 | 31 (0.8)        | 12 (1.2)       | 13 (0.8)        | 0.030 |
| Mild liver disease (%)                      | 76 (2.0)        | 41 (4.1)        | 26 (1.6)        | 0.099 | 81 (2.1)        | 22 (2.2)       | 27 (1.7)        | 0.023 |
| Severe liver disease (%)                    | 71 (1.8)        | 43 (4.3)        | 24 (1.5)        | 0.111 | 77 (2.0)        | 21 (2.1)       | 24 (1.5)        | 0.029 |
| Pulmonary diseases (%)                      | 123 (3.2)       | 34 (3.4)        | 74 (4.6)        | 0.050 | 131 (3.4)       | 37 (3.7)       | 56 (3.5)        | 0.011 |
| Moderate-severe kidney disease (%)          | 119 (3.1)       | 37 (3.7)        | 61 (3.8)        | 0.027 | 124 (3.2)       | 32 (3.2)       | 56 (3.5)        | 0.010 |
| Diabetes mellitus (%)                       | 273 (7.1)       | 107 (10.6)      | 158 (9.9)       | 0.084 | 305 (7.9)       | 88 (8.7)       | 136 (8.5)       | 0.021 |
| Diabetes complications (%)                  | 75 (1.9)        | 26 (2.6)        | 38 (2.4)        | 0.029 | 77 (2.0)        | 20 (2.0)       | 34 (2.1)        | 0.006 |
| Dementia (%)                                | 30 (0.8)        | 14 (1.4)        | 23 (1.4)        | 0.042 | 35 (0.9)        | 10 (1.0)       | 18 (1.1)        | 0.013 |
| Connective tissue disease (%)               | 6 (0.2)         | 4 (0.4)         | 3 (0.2)         | 0.031 | 8 (0.2)         | 2 (0.2)        | 3 (0.2)         | 0.008 |
| Paraplegia (%)                              | 15 (0.4)        | 3 (0.3)         | 7 (0.4)         | 0.015 | 15 (0.4)        | 4 (0.4)        | 6 (0.4)         | 0.003 |
| <b>Bleeding aetiologies</b>                 |                 |                 |                 |       |                 |                |                 |       |
| Neoplasm (%)                                | 107 (2.8)       | 29 (2.9)        | 65 (4.1)        | 0.047 | 108 (2.8)       | 29 (2.9)       | 62 (3.9)        | 0.040 |
| Peptic ulcers (%)                           | 3518 (91.0)     | 889 (88.2)      | 1432 (89.4)     | 0.062 | 3509 (90.8)     | 898 (89.1)     | 1441 (90.0)     | 0.037 |

|                       |             |            |             |       |             |            |             |       |
|-----------------------|-------------|------------|-------------|-------|-------------|------------|-------------|-------|
| Varices (%)           | 160 (4.1)   | 66 (6.5)   | 56 (3.5)    | 0.094 | 166 (4.3)   | 47 (4.7)   | 59 (3.7)    | 0.033 |
| Other (%)             | 504 (13.0)  | 99 (9.8)   | 259 (16.2)  | 0.127 | 506 (13.1)  | 106 (10.5) | 247 (15.4)  | 0.098 |
| Endoscopic therapies  |             |            |             |       |             |            |             |       |
| Injection (%)         | 3405 (88.1) | 903 (89.6) | 1373 (85.8) | 0.078 | 3401 (88.0) | 914 (90.7) | 1377 (86.0) | 0.098 |
| Clipping (%)          | 890 (23.0)  | 267 (26.5) | 401 (25.0)  | 0.053 | 901 (23.3)  | 265 (26.3) | 403 (25.2)  | 0.047 |
| Thermocoagulation (%) | 2746 (71.0) | 680 (67.5) | 1094 (68.3) | 0.052 | 2736 (70.8) | 698 (69.2) | 1101 (68.8) | 0.029 |
| Banding (%)           | 92 (2.4)    | 44 (4.4)   | 33 (2.1)    | 0.088 | 97 (2.5)    | 31 (3.1)   | 34 (2.1)    | 0.044 |
| Others (%)            | 245 (6.3)   | 59 (5.9)   | 111 (6.9)   | 0.029 | 247 (6.4)   | 59 (5.9)   | 104 (6.5)   | 0.016 |

**Supplementary Table 2.** Chi-square test on outcomes. SD, standard deviation .

|                                                          | Early       | Urgent       | <i>P</i> -value | Late         | <i>P</i> -value |
|----------------------------------------------------------|-------------|--------------|-----------------|--------------|-----------------|
| n                                                        | 3865        | 1008         |                 | 1601         |                 |
| Length of Stay (mean (SD))                               | 6.49 (9.01) | 7.28 (12.07) | 0.058           | 6.96 (11.75) | 0.148           |
| In-hospital Mortality Rate (%)                           | 166 (4.3)   | 62 (6.2)     | 0.017           | 93 (5.8)     | 0.022           |
| Average Units of Blood Transfused in 30 Days (mean (SD)) | 2.91 (3.95) | 3.01 (3.64)  | 0.421           | 3.21 (4.11)  | 0.018           |

**Supplementary Table 3.** Cox regression on subgroups based on comorbidity burden. HR, hazard ratio. \* Hazard ratios for mortality and OGD outcomes are given as average hazard ratios, calculated using weighted Cox regression for nonproportional hazards.

| Outcome                                    | Subgroup                        | Timing | HR (95% CI)*          | P-value |
|--------------------------------------------|---------------------------------|--------|-----------------------|---------|
| 30-Day All-Cause Mortality                 | With Significant Comorbidity    |        |                       |         |
|                                            |                                 | Early  | Reference             | NA      |
|                                            |                                 | Urgent | 1.033 (0.780 - 1.368) | 0.819   |
|                                            | Without Significant Comorbidity | Late   | 1.242 (0.957 - 1.611) | 0.103   |
|                                            |                                 |        |                       |         |
|                                            |                                 |        |                       |         |
| 30-Day Repeat Therapeutic Endoscopy        | With Significant Comorbidity    | Early  | Reference             | NA      |
|                                            |                                 | Urgent | 1.694 (1.384 - 2.074) | <0.001  |
|                                            |                                 | Late   | 1.310 (1.058 - 1.622) | 0.013   |
|                                            | Without Significant Comorbidity |        |                       |         |
|                                            |                                 |        |                       |         |
|                                            |                                 |        |                       |         |
| 30-Day ICU Admission after Index Endoscopy | With Significant Comorbidity    | Early  | Reference             | NA      |
|                                            |                                 | Urgent | 1.294 (1.165 - 1.437) | <0.001  |
|                                            |                                 | Late   | 1.057 (0.947 - 1.180) | 0.323   |
|                                            | Without Significant Comorbidity |        |                       |         |
|                                            |                                 |        |                       |         |
|                                            |                                 |        |                       |         |

**Supplementary Table 4.** Cox regression on subgroups based on variceal versus nonvariceal bleeding. HR, hazard ratio. \* Hazard ratios for mortality and OGD outcomes are given as average hazard ratios, calculated using weighted Cox regression for nonproportional hazards.

| Outcome                                    | Subgroup    | Timing | HR (95% CI)*           | P-value |
|--------------------------------------------|-------------|--------|------------------------|---------|
| 30-Day All-Cause Mortality                 | Nonvariceal |        |                        |         |
|                                            |             | Early  | Reference              | NA      |
|                                            |             | Urgent | 1.432 (1.232 - 1.666)  | <0.001  |
|                                            |             | Late   | 1.270 (1.089 - 1.482)  | 0.002   |
|                                            | Variceal    |        |                        |         |
|                                            |             | Early  | Reference              | NA      |
|                                            |             | Urgent | 1.425 (0.818 - 2.481)  | 0.211   |
|                                            |             | Late   | 1.376 (0.784 - 2.415)  | 0.266   |
| 30-Day Repeat Therapeutic Endoscopy        | Nonvariceal |        |                        |         |
|                                            |             | Early  | Reference              | NA      |
|                                            |             | Urgent | 1.250 (1.135 - 1.377)  | <0.001  |
|                                            |             | Late   | 0.994 (0.899 - 1.100)  | 0.912   |
|                                            | Variceal    |        |                        |         |
|                                            |             | Early  | Reference              | NA      |
|                                            |             | Urgent | 0.877 (0.614 - 1.252)  | 0.470   |
|                                            |             | Late   | 1.732 (1.254 - 2.391)  | 0.001   |
| 30-Day ICU Admission after Index Endoscopy | Nonvariceal |        |                        |         |
|                                            |             | Early  | Reference              | NA      |
|                                            |             | Urgent | 1.417 (1.190 - 1.687)  | <0.001  |
|                                            |             | Late   | 0.634 (0.511 - 0.787)  | <0.001  |
|                                            | Variceal    |        |                        |         |
|                                            |             | Early  | Reference              | NA      |
|                                            |             | Urgent | 1.359 (0.333 - 5.542)  | 0.669   |
|                                            |             | Late   | 6.607 (1.948 - 22.404) | 0.002   |

**Supplementary Table 5.** Sensitivity analysis with univariate Cox regression. HR, hazard ratio. \* Hazard ratios for mortality and OGD outcomes are given as average hazard ratios, calculated using weighted Cox regression for nonproportional hazards.

| Outcomes                                     | Timing         | HR (95% CI)           | P-value |
|----------------------------------------------|----------------|-----------------------|---------|
| <b>Complete Case Analysis</b>                |                |                       |         |
| 30-Day All-Cause Mortality                   |                |                       |         |
|                                              | Early          | Reference             | NA      |
|                                              | Urgent         | 1.603 (1.287 - 1.998) | <0.001  |
|                                              | Late           | 1.251 (0.994 - 1.575) | 0.057   |
| 30-Day Repeat Therapeutic Endoscopy          |                |                       |         |
|                                              | Early          | Reference             | NA      |
|                                              | Urgent         | 1.294 (1.133 - 1.477) | <0.001  |
|                                              | Late           | 0.971 (0.842 - 1.121) | 0.691   |
| 30-Day ICU Admission after Index Endoscopy   |                |                       |         |
|                                              | Early          | Reference             | NA      |
|                                              | Urgent         | 1.198 (0.880 - 1.633) | 0.251   |
|                                              | Late           | 0.824 (0.584 - 1.163) | 0.272   |
| <b>No Baseline Characteristics Balancing</b> |                |                       |         |
| 30-Day All-Cause Mortality                   |                |                       |         |
|                                              | Early          | Reference             | NA      |
|                                              | Urgent         | 1.694 (1.306 - 2.197) | <0.001  |
|                                              | Late           | 1.407 (1.112 - 1.781) | 0.004   |
| 30-Day Repeat Therapeutic Endoscopy          |                |                       |         |
|                                              | Early          | Reference             | NA      |
|                                              | Urgent         | 1.411 (1.192 - 1.670) | <0.001  |
|                                              | Late           | 1.016 (0.867 - 1.190) | 0.846   |
| 30-Day ICU Admission after Index Endoscopy   |                |                       |         |
|                                              | Early          | Reference             | NA      |
|                                              | Urgent         | 1.699 (1.251 - 2.307) | 0.001   |
|                                              | Late           | 0.711 (0.500 - 1.012) | 0.058   |
| <b>Effect of Weekend (versus Weekday)</b>    |                |                       |         |
| 30-Day All-Cause Mortality                   |                |                       |         |
|                                              | Early          | Reference             | NA      |
|                                              | Urgent         | 1.412 (1.222 - 1.632) | <0.001  |
|                                              | Late           | 1.252 (1.079 - 1.453) | 0.003   |
|                                              | <b>Weekend</b> | 1.064 (0.931 - 1.216) | 0.361   |
| 30-Day Repeat Therapeutic OGD                |                |                       |         |
|                                              | Early          | Reference             | NA      |
|                                              | Urgent         | 1.410 (1.191 - 1.669) | <0.001  |
|                                              | Late           | 1.001 (0.854 - 1.175) | 0.986   |
|                                              | <b>Weekend</b> | 1.113 (0.960 - 1.292) | 0.157   |
| 30-Day ICU Admission after Index Endoscopy   |                |                       |         |
|                                              | Early          | Reference             | NA      |
|                                              | Urgent         | 1.428 (1.201 - 1.699) | <0.001  |
|                                              | Late           | 0.709 (0.575 - 0.873) | 0.001   |
|                                              | <b>Weekend</b> | 0.970 (0.810 - 1.162) | 0.742   |
| <b>Alternative Timing: 4-24-48</b>           |                |                       |         |
| 30-Day All-Cause Mortality                   |                |                       |         |
|                                              | Early          | Reference             | NA      |

|                                            |        |                       |        |
|--------------------------------------------|--------|-----------------------|--------|
|                                            | Urgent | 1.427 (1.228 - 1.658) | <0.001 |
|                                            | Late   | 1.241 (1.072 - 1.438) | 0.004  |
| 30-Day Repeat Therapeutic Endoscopy        |        |                       |        |
|                                            | Early  | Reference             | NA     |
|                                            | Urgent | 1.294 (1.176 - 1.423) | <0.001 |
|                                            | Late   | 1.006 (0.914 - 1.107) | 0.904  |
| 30-Day ICU Admission after Index Endoscopy |        |                       |        |
|                                            | Early  | Reference             | NA     |
|                                            | Urgent | 1.460 (1.224 - 1.740) | <0.001 |
|                                            | Late   | 0.667 (0.544 - 0.819) | <0.001 |
| <b>Alternative Timing: 8-24-48</b>         |        |                       |        |
| 30-Day All-Cause Mortality                 |        |                       |        |
|                                            | Early  | Reference             | NA     |
|                                            | Urgent | 1.601 (1.368 - 1.875) | <0.001 |
|                                            | Late   | 1.396 (1.186 - 1.642) | <0.001 |
| 30-Day Repeat Therapeutic Endoscopy        |        |                       |        |
|                                            | Early  | Reference             | NA     |
|                                            | Urgent | 1.300 (1.179 - 1.433) | <0.001 |
|                                            | Late   | 1.041 (0.940 - 1.153) | 0.443  |
| 30-Day ICU Admission after Index Endoscopy |        |                       |        |
|                                            | Early  | Reference             | NA     |
|                                            | Urgent | 1.582 (1.315 - 1.903) | <0.001 |
|                                            | Late   | 0.736 (0.591 - 0.917) | 0.006  |
