# Supplementary material
Source: HighWire-hosted journal article supplement (https://gut.bmj.com/content/71/8/1544)
Supplement: inline-supplementary-material-2 [file inline-supplementary-material-2.pdf]

## Clinical Question

Does the timing of endoscopy affect clinical outcomes in patients presenting with acute upper gastrointestinal bleeding?

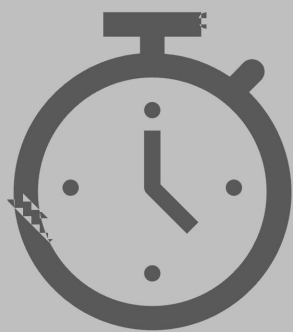

## Methods

- Retrospective, territory-wide, adult cohort
- Baseline adjusted by inverse probability of treatment weighting (IPTW) method

|                             |           |
|-----------------------------|-----------|
| Urgent ( $t \leq 6$ hr)     | n = 1,008 |
| Early ( $6 < t \leq 24$ hr) | n = 3,865 |
| Late ( $24 < t \leq 48$ hr) | n = 1,601 |

## Results

30-day all-cause mortality

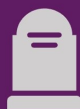

30-day repeat endoscopic therapy

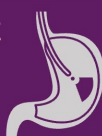

|                           |                    |
|---------------------------|--------------------|
| Urgent ( $t \leq 6$ )     | 1.43 (1.24 - 1.65) |
| Early ( $6 < t \leq 24$ ) | Reference          |
| Late ( $24 < t \leq 48$ ) | 1.25 (1.08 - 1.45) |

|                           |                    |
|---------------------------|--------------------|
| Urgent ( $t \leq 6$ )     | 1.22 (1.11 - 1.33) |
| Early ( $6 < t \leq 24$ ) | Reference          |
| Late ( $24 < t \leq 48$ ) | 1.04 (0.94 - 1.15) |
